# Supplementary material for: High-resolution structures with bound Mn2+ and Cd2+ map the metal import pathway in an Nramp transporter
Source: eLife. 2023 Apr 11;12:e84006. doi: 10.7554/eLife.84006 (PMC10185341; doi:10.7554/eLife.84006)
Supplement: Figure 1—source data 3. [file elife-84006-fig1-data3.xlsx]

## Sheet: Emptyliposomes_Mn_1
Time	-120mV	-80mV	-40mV	0mV
0	-0.165352	-0.522103	-0.566275	-0.320422
0.133333	0.59418	-0.52128	-0.732834	-0.683941
0.266667	-0.67937	-0.575424	-0.659523	0.403632
0.4	-0.804668	0.565049	0.165377	0.264967
0.533333	0.158022	0.117404	0.2082	0.338173
0.666667	-0.0237192	0.838867	0.374701	0.440577
0.8	0.200185	0.0326188	-0.129076	-0.126989
0.933333	-0.353095	0.0979021	-0.743687	-0.174355
1.06667	-0.30474	-0.0454712	-0.15309	-0.859158
1.2	5.86732	2.1747	4.51536	6.84161
1.33333	5.33855	2.7621	4.23947	6.16225
1.46667	5.58877	1.34998	4.11942	6.60124
1.6	5.47582	2.39142	3.93534	7.24441
1.73333	4.16955	1.84235	3.90869	6.41727
1.86667	5.54142	2.2188	3.9609	6.16215
2	4.98479	2.23523	4.10706	7.22847
2.13333	5.52804	2.26415	3.61639	7.21774
2.26667	4.5498	2.67672	3.77063	7.70535
2.4	5.59874	2.07479	4.12788	6.83725
2.53333	3.98638	3.56041	5.02252	6.18809
2.66667	4.8596	2.47587	4.49567	6.79479
2.8	4.66742	1.85091	4.52947	7.27047
2.93333	5.21568	2.30703	3.57102	6.6959
3.06667	5.03763	2.24133	3.86913	6.78604
3.2	4.99848	2.58435	4.37382	6.7598
3.33333	5.47396	2.49307	4.57119	7.04009
3.46667	4.93906	1.91199	3.44221	6.64306
3.6	5.45928	2.18607	4.9109	6.60417
3.73333	5.6802	2.67249	5.15538	6.5679
3.86667	4.69395	2.67105	4.38873	7.7901
4	4.28796	2.32367	3.66014	6.70562
4.13333	5.12935	3.08831	3.1476	7.10214
4.26667	4.94306	2.37464	3.48921	7.2633
4.4	5.53464	1.73314	4.63116	7.14969
4.53333	5.13651	2.45009	4.143	7.78563
4.66667	3.51693	2.77201	4.14519	6.42675
4.8	4.66134	2.39774	3.41579	7.36863
4.93333	4.58812	2.82276	3.631	7.04161
5.06667	5.09288	2.43676	5.25213	7.35698
5.2	4.60173	2.95821	4.3928	6.67073
5.33333	5.27027	2.10575	3.85737	6.65732
5.46667	4.77077	2.70433	4.39609	7.1011
5.6	4.69184	2.74685	4.19042	7.84268
5.73333	4.18633	2.63497	4.83009	7.19634
5.86667	5.03238	1.83305	4.43183	6.65691
6	3.79212	3.17503	4.18083	6.43579
6.13333	4.52527	2.37126	4.34295	6.7216
6.26667	4.3524	3.30452	3.638	6.31324
6.4	5.3346	3.10528	4.17111	6.69499
6.53333	4.04931	2.50389	4.91684	7.69941
6.66667	4.3	2.13882	3.70128	6.34192
6.8	4.56094	3.03482	4.06814	7.26448
6.93333	5.23715	2.57394	4.88312	7.24642
7.06667	4.82688	3.51794	2.9775	7.13078
7.2	4.10312	3.23211	4.54774	6.45874
7.33333	4.59925	2.45491	3.78709	6.9187
7.46667	4.88004	1.35297	4.25754	7.05918
7.6	4.76128	2.4036	3.98249	6.99733
7.73333	5.02166	2.24342	3.46739	7.7058
7.86667	4.87956	2.55178	4.26337	7.14632
8	4.4976	2.02995	5.80405	6.51123
8.13333	3.91169	2.59413	3.91293	6.75185
8.26667	3.69165	1.46814	4.75468	7.46498
8.4	4.78712	2.47076	4.88501	6.57075
8.53333	4.57822	2.20782	4.11256	7.47622
8.66667	4.21123	2.28837	4.20843	6.75671
8.8	4.70435	2.98952	4.71895	7.08621
8.93333	4.33088	2.42377	4.99852	6.35241
9.06667	4.81128	2.05096	5.37176	6.40189
9.2	4.58818	2.21471	4.1371	6.73554
9.33333	4.19034	3.15814	4.72264	7.93289
9.46667	4.66857	2.49822	5.68771	6.87189
9.6	4.69279	2.72791	4.01418	6.79768
9.73333	3.6383	3.29866	5.11396	7.82387
9.86667	4.66875	3.09415	3.41885	7.81783
10	3.70209	2.09892	4.80356	6.95496
Slope (initial rate)	0.98	0.53	0.26	0.11

## Sheet: Emptyliposomes_Mn_2
Time	-120mV	-80mV	-40mV	0mV
0	0.161014	-0.27619	0.0982986	4.50909e-05
0.133333	0.555549	1.18224	0.214382	0.283989
0.266667	-0.462349	1.11998	0.321231	0.0801157
0.4	-0.921579	0.745868	1.26938	-0.689883
0.533333	-0.2856	0.701203	-0.0883052	0.256503
0.666667	0.216714	0.686397	-1.16195	-1.00596
0.8	0.289595	1.3353	0.593509	0.53133
0.933333	0.2412	-2.84141	-0.752725	0.175429
1.06667	-0.106769	-3.08443	-0.569233	-0.135693
1.2	-0.0457657	1.96526	3.68238	3.17754
1.33333	0.870454	2.03756	2.74015	2.21823
1.46667	2.09563	1.74699	2.46602	2.44218
1.6	0.890531	1.78017	2.74567	2.6006
1.73333	0.833431	1.7725	4.01575	2.83369
1.86667	1.1987	1.22609	2.60955	1.99935
2	-0.145031	1.29375	2.4677	2.36933
2.13333	0.257103	0.28419	1.29791	2.30229
2.26667	0.867834	1.34984	3.45015	1.43175
2.4	1.42146	0.737773	2.87663	3.02768
2.53333	2.49281	1.59675	2.16966	2.59513
2.66667	0.543635	1.43379	1.92876	2.29776
2.8	0.6185	1.47966	2.07076	2.04708
2.93333	1.11989	1.17674	2.1983	1.87433
3.06667	0.881657	0.690097	2.50082	1.82784
3.2	1.77234	0.912717	1.89012	2.07202
3.33333	0.0527892	0.618857	1.83085	1.97869
3.46667	1.92631	1.06382	2.70315	1.68476
3.6	1.27147	0.145939	2.34751	2.40969
3.73333	0.722068	0.417454	2.48433	2.76176
3.86667	1.3243	0.393963	3.3385	2.94107
4	2.3237	-0.0849825	1.39059	3.76726
4.13333	0.256689	0.506579	1.34264	2.31536
4.26667	0.380574	0.17351	2.19474	2.95751
4.4	0.829268	0.504306	2.20001	2.29454
4.53333	1.02528	-0.370846	2.40843	2.5003
4.66667	0.901212	-0.940476	2.3861	2.92873
4.8	0.023316	-0.819198	0.710323	2.78135
4.93333	0.760479	-0.0741129	2.4972	2.42061
5.06667	1.99134	0.045498	1.8656	3.03183
5.2	0.767255	-0.642601	2.29368	2.82431
5.33333	1.62879	0.0684956	2.33012	2.93777
5.46667	0.897424	-0.879516	2.31894	2.40467
5.6	1.17178	0.592799	3.60371	2.06519
5.73333	1.12742	-0.104801	1.94222	2.30844
5.86667	1.97276	-1.21012	2.57715	2.9316
6	-0.538256	0.525069	1.39811	3.19133
6.13333	1.5089	0.184951	2.53492	3.59097
6.26667	1.38984	-0.756582	1.44667	3.46144
6.4	0.921182	-0.564733	2.26149	4.24369
6.53333	2.34828	0.362853	2.19394	3.49418
6.66667	1.42999	-0.550504	2.04569	1.9628
6.8	1.14284	-1.36387	1.09709	2.59233
6.93333	1.79781	-1.25722	1.76636	2.49362
7.06667	0.918801	-1.33957	3.51777	3.35005
7.2	0.374805	-0.806608	1.66852	2.27742
7.33333	1.42725	-1.29917	1.99977	2.53854
7.46667	0.865689	-0.476314	1.40462	3.48794
7.6	1.83222	-1.42699	2.71168	2.42348
7.73333	0.457548	-0.572468	2.61923	2.74458
7.86667	0.658763	-1.8146	2.0583	3.32404
8	0.703581	-0.898961	2.17836	3.92628
8.13333	1.81256	-0.526309	2.71996	2.99262
8.26667	1.37845	-0.737633	2.08802	3.33131
8.4	1.41506	-0.67814	2.19316	3.3302
8.53333	1.66027	-0.887505	2.63424	4.19922
8.66667	0.495342	-1.37626	3.36557	3.45515
8.8	1.03161	-0.678993	2.91738	3.12361
8.93333	0.597474	-0.514976	1.8992	2.28292
9.06667	0.812585	-2.73369	2.37822	2.35009
9.2	0.978803	-1.31128	2.22298	3.39244
9.33333	0.605555	-0.907747	1.86064	3.7329
9.46667	0.528972	-1.20242	2.7238	3.42931
9.6	1.20242	-1.61642	2.69678	2.92709
9.73333	1.99336	-0.126048	2.85035	2.99535
9.86667	1.65833	-0.548032	2.4963	2.41494
10	1.32808	-0.218107	2.41726	4.03628
Slope (initial rate)	0.96	0.66	0.63	0.24

## Sheet: Emptyliposomes_Mn_3
Time	-120mV	-80mV	-40mV	0mV
0	-1.14833	-0.303488	-1.45061	-0.350427
0.133333	-0.408051	-0.0107707	-0.590581	0.263043
0.266667	-0.110608	0.0406404	0.275837	-0.181706
0.4	-0.890538	0.917325	0.228074	0.15535
0.533333	0.217711	-0.574348	1.6422	0.899822
0.666667	-0.272585	0.101572	1.1857	-0.470747
0.8	-0.297778	-0.815082	0.527262	0.589496
0.933333	1.09503	-1.11744	-0.772094	-0.617816
1.06667	0.0496624	-0.891876	-0.94126	-0.265309
1.2	11.3935	4.18471	5.20399	5.11436
1.33333	11.3459	4.21094	5.04683	5.49839
1.46667	11.7279	4.11791	5.24828	5.41942
1.6	12.2489	4.78698	5.52849	5.41401
1.73333	11.3576	3.87684	5.12949	4.74582
1.86667	12.0077	3.92378	4.26093	5.5812
2	11.7241	3.98843	5.37342	5.60445
2.13333	11.8473	4.10305	5.3109	5.83975
2.26667	12.2557	3.89421	5.63658	5.92458
2.4	11.5883	4.00784	5.43729	4.59016
2.53333	12.4002	4.48878	4.90025	5.84377
2.66667	11.7914	3.73403	5.75605	5.30822
2.8	11.6645	3.23789	6.14933	5.0398
2.93333	11.3276	4.41939	4.40479	5.88899
3.06667	11.7578	4.46144	5.54942	5.4624
3.2	11.5367	4.02689	5.98863	5.64068
3.33333	11.3804	4.45745	5.24429	4.91686
3.46667	11.0503	3.87947	6.12802	5.57889
3.6	10.2357	4.4739	5.63585	5.46564
3.73333	12.1547	4.89893	6.20624	5.73972
3.86667	11.6469	4.52082	5.51282	6.43009
4	11.4138	4.63834	4.80702	6.68234
4.13333	11.8339	5.01305	5.20924	5.5572
4.26667	11.7036	5.50228	5.31015	5.4884
4.4	11.8524	4.1337	5.62248	5.33149
4.53333	12.8313	5.33072	6.14966	5.42983
4.66667	11.8707	4.54112	5.46915	6.12527
4.8	10.8756	4.72563	5.71611	5.92457
4.93333	12.3443	4.66142	4.9118	5.95475
5.06667	12.3382	5.50498	5.65003	5.8697
5.2	11.241	3.96348	6.09886	5.95202
5.33333	12.4691	5.35999	5.94983	5.28501
5.46667	12.0214	5.10909	5.68563	6.10897
5.6	11.9968	4.98068	5.70772	5.82968
5.73333	11.7737	5.57295	5.66587	6.50723
5.86667	11.4422	4.30319	5.84535	5.62094
6	11.5508	4.46638	6.49598	6.04987
6.13333	11.6357	4.3649	5.63842	6.31955
6.26667	12.0433	4.70487	6.1951	6.1859
6.4	11.7696	5.95441	5.23607	6.16327
6.53333	11.5974	4.98862	7.02085	5.99807
6.66667	11.643	5.59283	6.42826	6.07491
6.8	12.0615	5.3771	5.7221	6.43949
6.93333	11.6944	4.51187	5.95201	6.38299
7.06667	11.8659	5.01927	6.70897	6.35573
7.2	12.6759	5.00379	5.23968	7.06098
7.33333	12.1698	4.6538	5.55471	5.35002
7.46667	12.1753	4.53998	6.20824	5.81885
7.6	11.4323	5.15554	6.10328	5.66342
7.73333	12.3266	4.86645	6.03945	6.62946
7.86667	11.4508	4.50399	5.30679	5.91545
8	11.374	4.80264	5.96502	6.56937
8.13333	11.9327	4.69949	6.51478	5.98494
8.26667	11.9297	5.59488	6.34869	6.60959
8.4	11.6872	5.17654	6.22354	5.68487
8.53333	11.9402	4.87874	6.50175	6.37693
8.66667	11.5263	4.92296	6.12568	6.25775
8.8	12.0444	4.8304	5.74493	6.72105
8.93333	11.3936	5.11943	6.3452	6.42982
9.06667	11.4274	5.57294	5.34682	6.36315
9.2	11.3826	4.79819	6.58534	6.14416
9.33333	12.0267	5.4289	5.87917	6.26897
9.46667	11.8561	5.85187	5.35263	7.02647
9.6	10.6478	5.24162	5.3669	6.34972
9.73333	11.7054	4.85777	6.51657	6.38437
9.86667	11.3394	4.36547	6.0502	6.09249
10	11.1652	5.08687	5.8219	5.80534
Slope (initial rate)	0.52	0.37	0.31	0.25

## Sheet: Emptyliposomes_Cd_1
Time	-120mV	-80mV	-40mV	0mV
0	-1.28963	-0.497791	0.453061	-0.299601
0.133333	-0.061864	0.0615571	0.2348	0.141242
0.266667	-0.15935	-0.0328772	0.0965871	0.298812
0.4	0.820568	0.164306	-0.549522	0.301491
0.533333	0.138373	0.200672	0.0182062	0.150242
0.666667	0.88785	-0.313659	-0.0499621	-0.370458
0.8	0.386122	0.141765	-0.374751	-0.095095
0.933333	-0.746316	-0.366346	-0.318699	-0.16941
1.06667	-0.0227202	0.547351	0.215562	0.332258
1.2	1.11539	1.34936	1.72998	1.88809
1.33333	1.68892	2.08352	1.93305	1.5202
1.46667	1.71498	1.93476	1.80665	1.2412
1.6	1.26504	2.00422	1.66558	2.00037
1.73333	0.944071	2.08333	1.93287	1.999
1.86667	2.34018	1.70481	1.31738	2.12099
2	1.52705	2.19258	2.00851	2.01013
2.13333	1.59216	1.54807	2.16367	1.84374
2.26667	1.68156	2.06254	2.63671	1.47353
2.4	1.1126	1.99517	2.19055	1.4612
2.53333	2.07885	2.46365	1.52335	2.11921
2.66667	2.24923	1.98786	1.87626	2.48484
2.8	2.06116	2.03738	2.9279	2.4906
2.93333	2.15579	2.80668	2.80042	2.38929
3.06667	1.93245	2.12471	2.66168	2.67376
3.2	1.76277	2.14475	2.20451	2.41378
3.33333	1.62419	2.27286	2.08488	2.18897
3.46667	2.69553	2.55943	2.47782	2.0502
3.6	1.99598	2.72028	2.00136	2.22402
3.73333	2.19805	2.50856	2.84578	2.43411
3.86667	1.83825	2.40583	2.72321	2.19657
4	2.40689	1.73469	2.83647	2.67673
4.13333	2.76814	2.40732	2.07776	3.03387
4.26667	1.94261	1.60333	2.27001	2.36658
4.4	2.674	2.66632	2.86086	2.86123
4.53333	2.02532	2.65796	2.93317	3.07113
4.66667	2.20401	2.98823	2.34331	2.65538
4.8	2.38234	2.25693	2.76352	2.51428
4.93333	2.88135	2.80492	1.98997	2.64064
5.06667	2.63162	2.82594	2.30761	2.80043
5.2	2.61485	2.00209	3.00066	2.04615
5.33333	2.81353	2.05217	2.52428	2.59494
5.46667	2.45624	2.81475	2.4817	2.17115
5.6	2.9145	2.73649	3.09873	3.08477
5.73333	2.59162	2.75636	3.12043	2.87296
5.86667	2.31341	2.75215	2.86047	3.35073
6	2.53264	3.13071	2.86334	3.34522
6.13333	3.21126	3.51974	3.25673	3.10519
6.26667	3.42718	2.82262	3.18509	3.56063
6.4	3.10569	2.81706	3.78166	3.06644
6.53333	2.85575	2.71273	3.04769	3.64175
6.66667	2.4165	3.72795	3.93924	3.29245
6.8	3.57791	2.59183	3.68725	3.87328
6.93333	2.41173	3.48083	2.98583	3.24822
7.06667	2.85833	3.22317	3.45825	3.82104
7.2	2.65079	3.34897	3.98006	3.65803
7.33333	3.68183	3.33133	3.65445	3.63731
7.46667	2.99642	3.22953	3.48324	3.94242
7.6	3.13169	3.15333	3.04973	3.50269
7.73333	3.06336	3.00976	3.72563	3.81491
7.86667	3.08946	3.68351	4.44249	2.9956
8	3.41391	3.09256	3.14066	3.73086
8.13333	3.04304	4.2645	3.18904	3.42241
8.26667	2.70501	3.95784	3.95315	3.69432
8.4	3.48713	3.45353	3.18404	3.52679
8.53333	3.92469	3.05395	3.2945	3.52698
8.66667	3.15617	2.81328	4.05719	3.73839
8.8	3.04519	3.78096	3.70966	4.31427
8.93333	3.81833	3.5701	4.11026	3.57814
9.06667	2.80169	4.078	3.83662	4.6296
9.2	3.76642	3.69863	3.18193	4.4768
9.33333	3.67568	3.15493	3.31938	4.11742
9.46667	3.20952	3.35313	4.20061	4.67835
9.6	3.35937	3.427	3.87741	4.60492
9.73333	3.55817	4.07975	4.16905	4.09342
9.86667	3.97784	4.28637	3.90186	4.76345
10	3.57079	3.56512	3.77718	4.33398
Slope (initial rate)	0.62	0.51	0.47	0.07

## Sheet: Emptyliposomes_Cd_2
Time	-120mV	-80mV	-40mV	0mV
0	0.263101	-0.719135	-0.584864	-0.0389644
0.133333	-0.14293	1.12728	0.196394	-0.0441181
0.266667	0.0700682	0.127259	-0.121569	0.467735
0.4	0.507389	-0.334624	0.112987	0.380842
0.533333	-0.289854	-0.439043	0.427768	-0.25271
0.666667	0.0214883	0.080078	-0.0204402	-0.334909
0.8	-0.417038	0.150839	0.147826	-0.337459
0.933333	0.45575	-0.246378	0.169273	-0.109258
1.06667	-0.186807	0.778868	-0.190459	-0.564191
1.2	1.51609	1.93786	1.59543	1.44387
1.33333	1.45216	1.6006	1.45077	1.90414
1.46667	0.99063	1.40852	2.54575	1.98818
1.6	1.00239	1.81066	2.04949	1.07235
1.73333	1.34438	1.3694	1.74408	2.14424
1.86667	1.2531	1.60836	2.05483	2.52285
2	1.93102	2.33491	1.48822	1.94504
2.13333	1.32267	2.12031	1.76091	2.32348
2.26667	1.76022	2.183	1.8192	2.08291
2.4	2.05862	2.08688	1.79719	1.78159
2.53333	1.32921	1.828	2.41595	2.61897
2.66667	1.93754	1.98315	2.36093	2.44607
2.8	1.41521	2.14824	1.625	2.56626
2.93333	1.77627	1.89366	2.0621	2.81228
3.06667	1.46166	1.61879	2.41629	2.38075
3.2	1.95064	1.92716	2.09502	1.7647
3.33333	2.68322	2.8644	2.38315	2.22814
3.46667	1.31516	2.20671	2.50857	2.7744
3.6	2.02113	1.60738	2.3618	2.46516
3.73333	1.11516	2.05428	2.3267	2.61028
3.86667	2.34867	1.6409	2.46043	2.58638
4	2.2901	2.49848	2.33096	2.18801
4.13333	2.64827	2.55111	2.30543	2.90345
4.26667	2.02353	2.81487	2.70036	2.60166
4.4	2.02693	1.87775	2.72046	2.8998
4.53333	2.11527	2.50915	2.44231	2.29535
4.66667	2.40262	2.36592	2.61422	2.40481
4.8	2.11725	1.45907	3.08792	2.74563
4.93333	2.3728	1.95866	2.73039	2.74563
5.06667	2.40183	2.95527	3.33584	2.73014
5.2	2.20005	3.00731	2.14637	3.4394
5.33333	2.33977	2.78557	2.71927	2.88089
5.46667	1.63813	3.07094	2.99329	3.27096
5.6	2.49037	2.58292	2.86672	2.8386
5.73333	2.23201	2.24506	3.0211	3.18026
5.86667	2.56425	2.28618	2.81395	2.57047
6	2.60992	3.01944	2.72082	2.91465
6.13333	3.18669	2.88389	2.48482	2.5601
6.26667	3.30958	2.49754	3.05996	3.64893
6.4	2.76017	2.79	2.93412	4.02403
6.53333	2.65752	2.58838	4.00092	3.1161
6.66667	2.51948	2.84259	3.22637	4.08828
6.8	2.36442	3.16603	3.2388	2.72105
6.93333	3.30388	3.0801	3.00218	2.6077
7.06667	2.79682	3.54975	2.73786	3.34257
7.2	3.07722	2.52791	3.13677	3.37448
7.33333	2.21085	2.95886	3.48225	3.11032
7.46667	2.67553	2.76814	3.53741	3.23111
7.6	2.85458	3.40419	3.02028	3.99926
7.73333	2.84861	3.17915	3.62317	3.66781
7.86667	2.77111	3.44811	3.21278	3.7557
8	3.4514	2.58862	3.22864	3.66105
8.13333	3.33562	2.52369	2.56619	3.65757
8.26667	3.1853	3.38513	3.49435	3.68058
8.4	3.01737	2.85635	2.97394	4.68684
8.53333	3.07826	2.97726	3.66265	4.10601
8.66667	2.74359	3.49576	3.19498	3.71509
8.8	3.16367	3.37651	3.4068	4.38224
8.93333	2.78998	3.03208	3.66234	3.4889
9.06667	3.06088	3.51729	3.44499	4.06701
9.2	2.91739	3.08969	3.32656	4.82967
9.33333	2.99038	3.70288	3.95621	4.63096
9.46667	2.99927	3.73726	3.42224	4.72603
9.6	3.43728	2.77514	3.13168	3.77963
9.73333	3.23399	3.49488	3.54679	4.05639
9.86667	3.87309	4.09916	3.36139	4.3473
10	3.25286	3.35074	3.41306	4.46726
Slope (initial rate)	0.77	0.32	0.31	0.02

## Sheet: Emptyliposomes_Cd_3
Time	-120mV	-80mV	-40mV	0mV
0	-0.827098	-0.481573	0.447102	-0.310043
0.133333	0.375957	0.00557177	-0.13745	-0.151331
0.266667	-0.163934	0.402982	0.167385	-0.0191251
0.4	-0.029528	-0.283	0.35695	-0.159251
0.533333	-0.106088	-0.35279	0.58611	-0.537889
0.666667	0.284964	0.0724936	-0.0556407	0.0721056
0.8	-0.190082	0.737033	-0.336839	0.483813
0.933333	0.693048	-0.297366	-0.420053	0.700224
1.06667	0.301342	0.598569	-0.298731	0.502498
1.2	0.255292	0.520121	-0.0708339	-0.310043
1.33333	0.0895129	0.769897	0.115532	-0.151331
1.46667	0.388526	-0.0617694	0.650204	-0.0191251
1.6	0.575102	0.461559	0.115992	-0.159251
1.73333	0.58819	0.500151	0.414302	-0.537889
1.86667	0.438581	0.791073	0.558471	0.0721056
2	0.782255	0.955153	-0.155464	0.483813
2.13333	0.62895	0.528301	0.139805	0.700224
2.26667	0.579993	-0.341677	-0.104976	0.502498
2.4	0.763141	0.497477	0.274302	0.229178
2.53333	1.03285	0.927677	0.364911	0.438086
2.66667	1.25402	0.487468	1.14158	0.851813
2.8	0.0992669	0.762739	0.621143	0.36962
2.93333	0.777558	1.04574	0.714753	0.516387
3.06667	1.31895	1.51479	0.984017	-0.195558
3.2	1.86911	1.26436	1.07594	0.867756
3.33333	1.57832	1.64871	1.0008	0.749421
3.46667	1.12669	1.66887	1.50606	0.647042
3.6	1.49778	0.984998	0.746295	0.428953
3.73333	1.41826	2.03349	1.09868	0.793178
3.86667	1.48068	1.30703	1.26784	0.815448
4	1.59525	1.43594	1.01203	0.695985
4.13333	1.70388	1.16717	1.45966	1.33966
4.26667	1.47581	2.18945	1.75262	1.534
4.4	1.53854	0.972836	2.04959	1.76443
4.53333	2.2709	1.39688	1.8815	0.991589
4.66667	2.33756	1.91352	2.1913	1.35912
4.8	1.26707	2.51706	1.86593	1.2714
4.93333	2.11677	2.15405	2.17643	2.08429
5.06667	2.02376	1.74476	2.46614	0.469932
5.2	2.42809	1.9917	2.08397	1.0142
5.33333	2.09271	1.1383	1.32314	1.01421
5.46667	1.99265	2.2508	2.00799	2.167
5.6	2.41154	2.66483	1.73021	1.53059
5.73333	2.73932	2.69542	1.88815	2.31774
5.86667	2.31491	2.528	2.09031	1.29633
6	2.00259	2.47787	2.82289	2.19983
6.13333	1.81046	2.50564	3.08817	1.68839
6.26667	2.47268	3.34076	3.17971	1.91503
6.4	2.66779	3.27193	2.76562	2.36955
6.53333	2.6185	2.32079	1.98575	1.48521
6.66667	2.93777	2.60947	2.62972	2.01746
6.8	3.20922	3.79585	2.46276	2.28219
6.93333	2.86824	2.89245	2.61317	2.45623
7.06667	3.08746	3.40061	2.02859	2.63467
7.2	3.43997	3.10128	3.25423	2.83247
7.33333	3.24525	3.18105	2.70264	3.14525
7.46667	3.73305	2.92498	3.56965	3.32212
7.6	3.25833	2.93697	3.04322	2.01999
7.73333	3.2913	1.78137	1.52312	2.26777
7.86667	4.23217	3.87193	3.10075	2.81373
8	3.0356	2.99887	2.44636	2.37425
8.13333	2.75214	2.83857	2.83621	2.54027
8.26667	3.43433	3.88348	2.94892	2.55523
8.4	3.54427	3.59604	3.68514	2.78682
8.53333	3.49086	3.29867	2.94624	2.85978
8.66667	4.18647	2.80071	3.28809	2.75019
8.8	4.15512	2.46736	3.17057	3.26153
8.93333	4.52494	3.6927	3.25404	3.46811
9.06667	3.49836	2.8692	3.53379	2.17506
9.2	4.29586	3.58637	3.8021	3.31668
9.33333	4.46418	3.5298	3.61712	3.4351
9.46667	3.69311	3.67716	3.78174	2.95126
9.6	4.57098	4.18211	4.04985	3.08082
9.73333	3.98414	4.03446	3.78383	2.94829
9.86667	3.94892	4.0458	3.42477	4.05059
10	4.10683	3.27571	3.84798	3.50984
Slope (initial rate)	0.66	0.61	0.51	0.1

## Sheet: WT_Mn_1
Time	-120mV	-80mV	-40mV	0mV
0	-0.41898	-1.26881	0.598819	0.547747
0.133333	-0.898097	-0.9045	0.0478288	-0.0684326
0.266667	-1.04178	-0.867031	0.0203008	-0.576899
0.4	0.456799	-0.918728	-0.0699652	-0.633815
0.533333	-0.485966	-0.20376	0.12172	-0.140996
0.666667	-0.592719	-0.308853	-0.310055	-0.592573
0.8	-0.484226	0.0962083	-1.08412	0.02637
0.933333	0.548423	0.370675	-1.10921	-0.877983
1.06667	-0.522338	1.247	0.321596	-1.10592
1.2	29.7406	17.3011	13.6665	11.0438
1.33333	36.72	19.2398	15.3583	10.6945
1.46667	44.3521	20.9023	15.8399	10.4555
1.6	49.8565	23.9334	15.6269	10.8684
1.73333	53.0319	27.3229	15.8262	10.8952
1.86667	56.2081	28.9326	16.9931	11.4932
2	57.8252	32.8365	16.9704	11.1457
2.13333	60.3994	35.0896	16.8247	11.2143
2.26667	61.3985	37.9685	16.9074	11.0389
2.4	63.0918	40.3679	17.1829	10.8713
2.53333	63.4262	42.4163	17.2974	11.1634
2.66667	64.845	44.4639	17.3587	9.81499
2.8	65.4894	46.9237	19.1428	12.3958
2.93333	66.1526	48.1499	19.2341	11.939
3.06667	66.5562	50.1232	20.1093	11.6728
3.2	67.0083	51.4913	19.6325	12.2059
3.33333	67.5967	53.012	20.4323	12.7227
3.46667	67.8975	54.9494	20.8136	12.9521
3.6	68.7823	56.1908	21.2452	12.5627
3.73333	68.3922	57.301	22.6637	12.4462
3.86667	68.3975	58.437	20.9993	12.6842
4	68.8993	59.5395	22.0135	12.9585
4.13333	68.85	60.1777	22.4604	13.0259
4.26667	69.3582	61.1326	23.2655	13.0015
4.4	69.9099	61.2256	24.3163	13.6361
4.53333	69.4547	62.2279	24.5018	13.0316
4.66667	70.1161	63.1214	25.0992	13.3975
4.8	69.9531	62.9939	25.6732	13.9524
4.93333	70.7085	63.4604	25.479	13.7436
5.06667	70.3543	64.3438	25.7808	14.3525
5.2	70.358	65.1695	26.7679	13.9977
5.33333	70.4748	65.0949	27.5786	14.4089
5.46667	70.2358	65.9591	27.6138	13.7114
5.6	71.3361	65.9972	28.3042	15.3909
5.73333	71.4313	66.2504	28.1961	14.3287
5.86667	71.4315	66.8741	29.3505	15.1177
6	71.3159	66.9148	29.6312	14.6215
6.13333	71.5648	67.0099	30.124	14.989
6.26667	71.1344	67.226	30.0309	15.0855
6.4	71.7683	68.2091	31.1936	15.0687
6.53333	72.188	68.0876	31.4229	15.1996
6.66667	72.6672	68.3147	32.7896	15.9391
6.8	71.8782	69.2233	33.2967	16.1521
6.93333	72.9921	68.9162	33.4069	16.1734
7.06667	72.7255	68.7474	33.7765	16.4306
7.2	72.7328	68.7995	34.5011	15.4868
7.33333	72.7329	68.8312	35.1577	15.6965
7.46667	73.1779	69.6848	35.0867	15.5021
7.6	72.8481	69.4367	35.9886	16.7217
7.73333	73.0721	69.6724	35.6051	16.7417
7.86667	73.2929	69.5655	37.2015	16.5267
8	72.7839	69.7885	37.189	16.5899
8.13333	73.2207	69.9901	37.4769	17.7327
8.26667	73.3579	70.0259	38.234	17.3711
8.4	73.5384	70.3312	39.0944	17.7693
8.53333	73.5856	70.7589	39.4138	16.2843
8.66667	73.4943	70.8078	39.6723	18.3166
8.8	72.8858	71.0073	40.5827	17.5726
8.93333	73.3793	71.1811	41.2895	17.5958
9.06667	73.8081	71.2746	41.7541	17.7262
9.2	73.858	70.8286	41.5673	17.6231
9.33333	74.3392	71.254	41.7749	17.9831
9.46667	73.8979	71.0616	41.9609	18.264
9.6	74.1271	72.0752	43.3842	18.4456
9.73333	74.5814	71.9573	43.6966	17.9665
9.86667	74.696	72.0408	44.7162	18.4086
10	74.7636	72.0215	44.2866	18.0354
Slope (initial rate)	35.333	19.396	3.5271	0.6275

## Sheet: WT_Mn_2
Time	-120mV	-80mV	-40mV	0mV
0	0.647533	1.31005	-0.113515	-0.0989591
0.133333	0.160245	0.398265	-0.427161	-0.293931
0.266667	0.573541	-0.356558	-0.410151	-0.446452
0.4	0.166918	-0.243034	0.0432082	-0.330855
0.533333	0.252637	-0.656183	0.0318862	-0.152407
0.666667	0.155131	-0.328902	0.622754	0.0222231
0.8	0.401229	0.26609	-0.0858651	0.852824
0.933333	-0.65522	0.255997	-0.0573377	-1.15306
1.06667	-0.488246	-0.223465	-0.702766	-1.09027
1.2	17.0854	15.9397	12.8133	15.3007
1.33333	23.7953	19.6614	13.1434	14.7912
1.46667	28.3884	23.0347	13.8025	15.5025
1.6	35.0402	27.958	14.2773	16.1525
1.73333	40.0806	30.9759	14.6722	16.42
1.86667	43.4712	34.1713	14.3472	15.9963
2	45.287	36.2884	15.1391	16.5463
2.13333	47.1077	38.4803	14.5738	16.2685
2.26667	48.6341	40.6504	15.7819	16.912
2.4	49.4672	41.5266	16.0913	16.8755
2.53333	51.0499	42.7142	16.4049	15.6409
2.66667	51.0469	43.3745	17.8371	16.2869
2.8	52.0118	44.5811	17.3601	17.5628
2.93333	51.5852	44.735	17.4734	17.2173
3.06667	52.5079	45.5856	18.9569	16.6759
3.2	52.6769	46.1498	19.0338	17.4752
3.33333	53.4912	46.8834	20.0609	16.3925
3.46667	54.0486	47.3189	20.6783	16.9653
3.6	54.6474	48.0609	21.0286	16.3879
3.73333	54.3123	48.4758	21.2303	17.0393
3.86667	54.4377	49.186	21.6386	17.2898
4	55.0757	49.4634	22.5683	17.4946
4.13333	56.0406	49.9995	23.7674	17.0194
4.26667	55.5894	50.2501	23.4618	17.4151
4.4	56.1283	50.4119	25.0293	16.9882
4.53333	55.9559	50.969	24.9848	17.5901
4.66667	56.0616	51.897	25.3653	17.2596
4.8	57.2034	51.4107	26.6793	17.3864
4.93333	56.8373	51.8373	26.6977	16.9995
5.06667	57.2731	52.6813	27.2151	18.1684
5.2	56.8285	53.6604	27.44	17.7591
5.33333	57.6578	53.0035	28.8292	17.9574
5.46667	57.5088	53.1546	29.1634	17.3667
5.6	57.7536	53.5666	29.6878	18.6003
5.73333	58.8084	53.837	30.1697	17.9426
5.86667	58.2625	54.1797	30.9647	18.161
6	58.9649	54.603	31.6299	17.8582
6.13333	58.7792	55.0253	32.7344	18.1898
6.26667	59.1985	54.9765	32.614	19.0066
6.4	59.3132	55.4572	32.785	18.8147
6.53333	59.5108	55.3461	32.976	19.0772
6.66667	59.4633	55.2375	34.3663	19.3185
6.8	59.8649	56.6082	34.4939	19.7442
6.93333	59.7109	56.9493	35.3763	19.8523
7.06667	60.4563	56.1088	35.4022	19.2338
7.2	60.5359	56.3058	36.2646	19.3706
7.33333	60.6175	57.0869	36.3741	19.1953
7.46667	59.9873	56.6703	36.6153	19.2634
7.6	60.8706	57.5797	37.2398	20.2986
7.73333	61.4315	57.8126	37.1956	19.6274
7.86667	61.2046	57.4142	37.6409	20.3286
8	61.232	58.067	37.7383	20.2505
8.13333	61.1195	58.2217	38.0148	20.4617
8.26667	61.6556	58.4266	38.3589	20.498
8.4	61.248	58.6719	39.8856	20.4664
8.53333	61.6908	58.4783	39.4547	21.217
8.66667	62.2153	58.5193	39.9005	20.6263
8.8	62.2532	59.1012	40.524	20.5156
8.93333	62.4693	59.5702	40.738	20.5394
9.06667	61.6536	58.903	41.2673	21.1263
9.2	62.1967	60.2003	41.2769	21.9402
9.33333	62.5575	59.4679	42.2488	21.619
9.46667	62.5289	59.4849	41.8711	21.8797
9.6	62.9378	59.7305	42.2298	22.7976
9.73333	63.4744	60.2787	43.0379	21.28
9.86667	63.3523	59.9309	42.6639	22.2418
10	63.2603	60.7843	43.4188	22.1011
Slope (initial rate)	36.334	26.252	2.748	1.8923

## Sheet: WT_Mn_3
Time	-120mV	-80mV	-40mV	0mV
0	1.11957	0.506979	0.726334	0.873665
0.133333	-0.460743	-0.926808	0.175677	0.260538
0.266667	0.0734443	-1.06136	0.14807	-0.246743
0.4	-0.441659	-0.173182	0.0577476	-0.30361
0.533333	0.0274511	-0.579177	0.250086	0.186603
0.666667	-0.0740635	-0.0508915	-0.18118	-0.264069
0.8	-0.117436	0.00908036	-0.954203	0.355594
0.933333	-0.0762348	-0.063742	-0.979778	-0.545409
1.06667	-0.012496	0.408495	0.450769	-0.771698
1.2	25.0945	19.0569	14.0012	11.3533
1.33333	33.3299	19.3637	15.1954	11.0058
1.46667	40.7037	22.9606	14.0778	10.7666
1.6	45.4806	24.395	15.2177	11.1778
1.73333	51.0107	28.4835	15.4858	11.2023
1.86667	54.9138	29.4744	16.3444	11.8017
2	57.8627	32.9043	17.1978	11.4542
2.13333	59.6314	35.6038	16.2584	11.5213
2.26667	61.451	37.9962	17.334	11.349
2.4	62.1548	39.5905	17.5568	11.1803
2.53333	63.2942	42.1754	18.0023	11.471
2.66667	64.2016	43.7985	16.9559	10.1287
2.8	65.2614	46.5498	17.7718	12.6974
2.93333	65.9292	48.3017	17.6921	12.2404
3.06667	66.1301	49.9395	19.8168	11.9786
3.2	66.4782	51.7147	19.3397	12.5063
3.33333	66.5942	53.2933	20.0855	13.0222
3.46667	67.2118	54.4514	19.859	13.2515
3.6	67.0116	55.1733	21.2504	12.864
3.73333	67.8194	56.7	21.2492	12.7423
3.86667	67.5566	57.1924	21.5709	12.9864
4	67.8344	58.6814	21.6538	13.256
4.13333	68.122	59.4367	21.6832	13.3227
4.26667	68.7936	60.2589	22.478	13.2982
4.4	68.9773	60.9571	22.8488	13.9321
4.53333	69.2663	61.2622	24.143	13.3279
4.66667	69.5079	62.0422	24.2871	13.6901
4.8	69.1241	62.5314	24.3635	14.243
4.93333	69.6943	63.2547	25.4296	14.0384
5.06667	70.3337	63.5373	25.0835	14.6427
5.2	70.1983	64.0827	25.6621	14.2884
5.33333	70.3989	64.4294	25.5163	14.6984
5.46667	70.1066	64.6962	26.1302	14.002
5.6	70.8038	65.1287	27.5975	15.6741
5.73333	70.3367	64.6164	27.6526	14.6189
5.86667	70.6009	65.5466	28.3658	15.4057
6	70.3695	66.5528	28.7713	14.9075
6.13333	70.9792	66.0379	28.665	15.2739
6.26667	71.2754	66.5596	30.1772	15.3718
6.4	71.9858	66.6152	30.9183	15.3536
6.53333	71.5484	67.4717	30.8078	15.484
6.66667	71.4424	67.2738	31.1348	16.222
6.8	71.6909	67.9441	32.0468	16.4334
6.93333	71.0867	67.4178	32.4121	16.4536
7.06667	72.0713	67.9833	32.279	16.7094
7.2	72.0454	68.3815	32.5115	15.7692
7.33333	72.0205	68.4434	32.3891	15.9766
7.46667	72.431	68.5552	34.2433	15.7849
7.6	72.2178	68.2988	34.0027	16.9995
7.73333	71.6013	68.2387	35.1702	17.0178
7.86667	72.2687	68.6235	35.3969	16.8031
8	72.0183	68.7208	34.9335	16.8683
8.13333	72.8166	69.6706	35.7943	18.0072
8.26667	72.7681	68.9592	36.214	17.6452
8.4	73.0075	69.6823	37.2649	18.0428
8.53333	72.7649	69.9301	38.018	16.5609
8.66667	73.4188	70.0752	37.7658	18.5869
8.8	73.4396	69.8923	38.6502	17.8439
8.93333	72.7627	69.7619	39.0069	17.868
9.06667	73.2095	70.2851	40.2348	17.9995
9.2	73.3989	70.5064	39.8343	17.8943
9.33333	73.4204	70.0122	40.5928	18.251
9.46667	73.9946	70.1921	41.3186	18.5349
9.6	73.6758	70.7662	41.7179	18.716
9.73333	73.7628	70.8189	41.8045	18.2353
9.86667	74.1274	71.5333	41.658	18.6771
10	74.1586	71.0166	43.1345	18.3042
Slope (initial rate)	40.655	18.023	3.561	0.624

## Sheet: WT_Cd_1
Time	-120mV	-80mV	-40mV	0mV
0	-0.002988	-0.576594	-0.0889253	0.0216233
0.133333	0.210591	0.458337	0.696225	-0.11338
0.266667	0.225725	-0.343706	-0.307983	0.439497
0.4	-0.207782	0.165602	0.150316	-0.119528
0.533333	-0.077196	0.130153	0.026767	-0.221598
0.666667	-0.00803853	0.0023297	-0.166242	0.531015
0.8	0.217919	0.0282878	-0.257315	0.291129
0.933333	0.0542295	0.120333	0.13654	-0.103235
1.06667	-0.213939	0.251899	0.117044	0.0109478
1.2	23.852	26.4902	26.0853	23.5944
1.33333	30.0293	27.7782	30.8736	28.0927
1.46667	37.5872	33.6236	33.8002	30.4893
1.6	40.0819	37.2301	36.9882	32.9991
1.73333	43.1985	41.0727	40.6314	35.0489
1.86667	47.9226	45.7729	42.455	37.1427
2	50.7317	48.6434	44.0946	38.9053
2.13333	51.3984	50.0265	46.0158	40.9708
2.26667	52.887	52.7818	48.816	42.8106
2.4	53.1198	53.5846	50.1347	43.7164
2.53333	54.9907	54.8429	50.4834	44.4745
2.66667	55.8049	55.3185	51.8485	46.0361
2.8	56.5539	56.1927	53.486	47.268
2.93333	56.9874	56.126	54.3476	48.4002
3.06667	57.8122	57.4018	54.7675	48.6847
3.2	58.2663	57.3757	55.2078	49.7607
3.33333	58.5248	58.4134	56.2479	50.4223
3.46667	59.5979	58.6048	56.7941	51.2053
3.6	59.5616	59.0032	57.316	52.3602
3.73333	60.2541	59.2039	57.1983	52.1242
3.86667	60.2551	59.5208	58.3256	53.0106
4	60.4489	60.2826	58.6699	53.3845
4.13333	61.707	60.1002	58.6357	54.0725
4.26667	61.387	60.5224	59.3266	54.5798
4.4	62.0578	61.0528	59.5637	55.3635
4.53333	62.729	60.9057	59.4895	55.4364
4.66667	62.7808	61.5691	59.8731	56.136
4.8	63.4116	61.5357	60.5851	55.6697
4.93333	63.3061	61.9566	60.7064	56.7946
5.06667	63.5415	62.1338	60.9438	56.7433
5.2	63.7618	62.1923	61.2647	57.0874
5.33333	64.1202	61.9961	61.8865	57.0208
5.46667	63.6996	62.0321	61.4098	58.2293
5.6	63.7461	62.4645	61.5852	58.0029
5.73333	63.9186	62.6678	62.0865	58.5209
5.86667	64.4655	62.8824	62.331	58.5632
6	65.0424	63.4659	62.3294	58.9007
6.13333	64.7071	62.7433	62.1497	58.8683
6.26667	65.427	63.529	63.0853	58.6669
6.4	65.1026	63.7623	63.2337	59.2692
6.53333	65.3007	63.5116	62.669	59.7491
6.66667	64.8068	63.4736	63.1174	59.1986
6.8	65.6037	64.351	62.8918	60.1969
6.93333	65.1395	63.6177	63.7556	60.3201
7.06667	65.6384	64.1677	63.3672	60.541
7.2	66.0624	63.8199	63.6277	60.8934
7.33333	65.9322	64.0778	64.2072	60.4748
7.46667	65.6387	64.1598	63.9733	61.1464
7.6	66.5794	64.5986	63.6209	60.6599
7.73333	66.2341	64.4485	64.6252	61.0886
7.86667	66.3555	64.2674	65.0302	61.3132
8	66.1807	64.6754	65.1142	61.0752
8.13333	66.1821	64.9281	65.0327	61.5085
8.26667	66.5553	64.4769	64.989	61.3388
8.4	66.4967	64.1591	64.9034	62.0084
8.53333	65.8073	64.5591	64.8139	62.0833
8.66667	66.7102	64.1848	64.873	62.2432
8.8	66.4012	64.7608	64.7686	62.0674
8.93333	66.572	64.7025	64.8312	62.8006
9.06667	66.4985	65.1518	65.1457	62.7558
9.2	66.8746	64.8669	64.8726	62.6871
9.33333	67.0242	65.4831	64.9281	62.8871
9.46667	66.6538	65.0027	65.1319	63.1389
9.6	66.708	64.8858	65.9253	62.9448
9.73333	67.4019	65.0866	65.6649	63.3105
9.86667	67.1866	65.0609	65.9798	62.9506
10	67.1662	64.9428	65.7762	63.0669
Slope (initial rate)	32.688	29.437	22.506	18.373

[truncated: 35 more sheets: WT_Cd_2, WT_Cd_3, D296A_Mn_1, D296A_Mn_2, D296A_Mn_3, D296A_Cd_1, D296A_Cd_2, D296A_Cd_3, D369A_Mn_1, D369A_Mn_2, D369A_Mn_3, D369A_Cd_1, D369A_Cd_2, D369A_Cd_3, Y54A_Mn_1, Y54A_Mn_2, Y54A_Cd_1, Y54A_Cd_2, Y54F_Mn_1, Y54F_Mn_2 …]
